# Supplementary material for: Vitamin B12 Deficiency Is Prevalent Among Czech Vegans Who Do Not Use Vitamin B12 Supplements
Source: MDPI journal article supplement (doi:10.3390/nu11123019), 2019-12-10
Supplement: s1 [file s1]

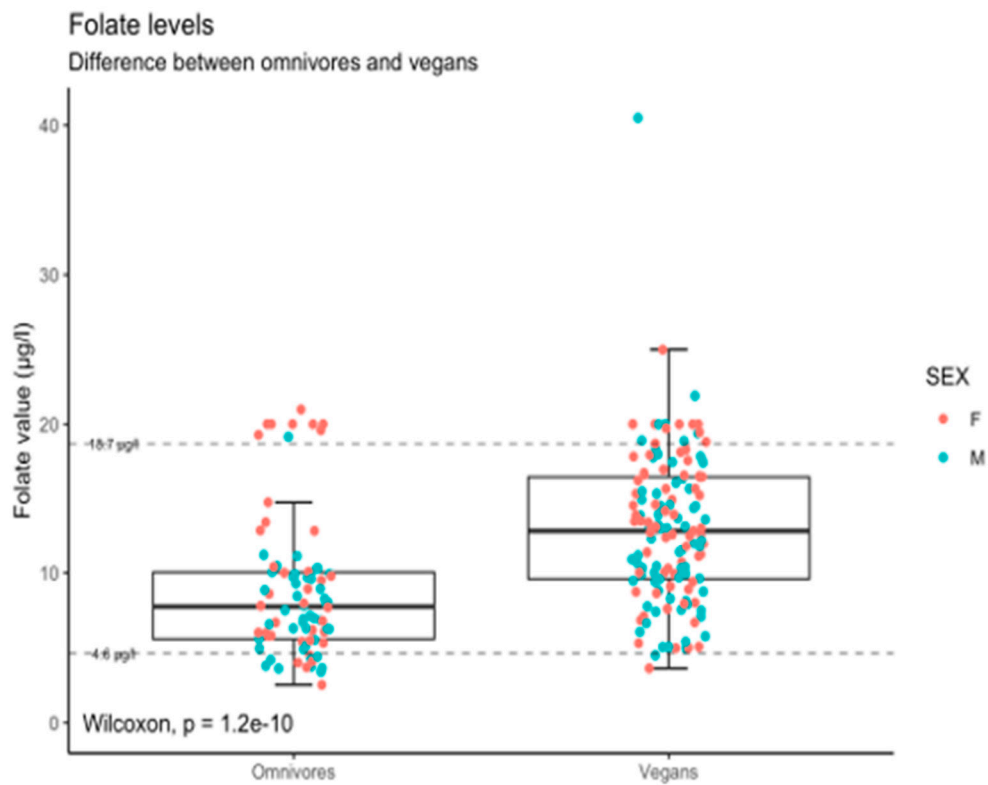

**Supplementary Figure S1.** Folate levels between vegans and non-vegans; Dashed lines indicated the reference interval of the marker. The coding of statistical significance:  $< 0.0001 = ****$ ,  $0.0001 - 0.001 = ***$ ,  $0.001 - 0.01 = **$ ,  $0.01 - 0.05 = *$ ,  $0.05 - 1 = ns$ .

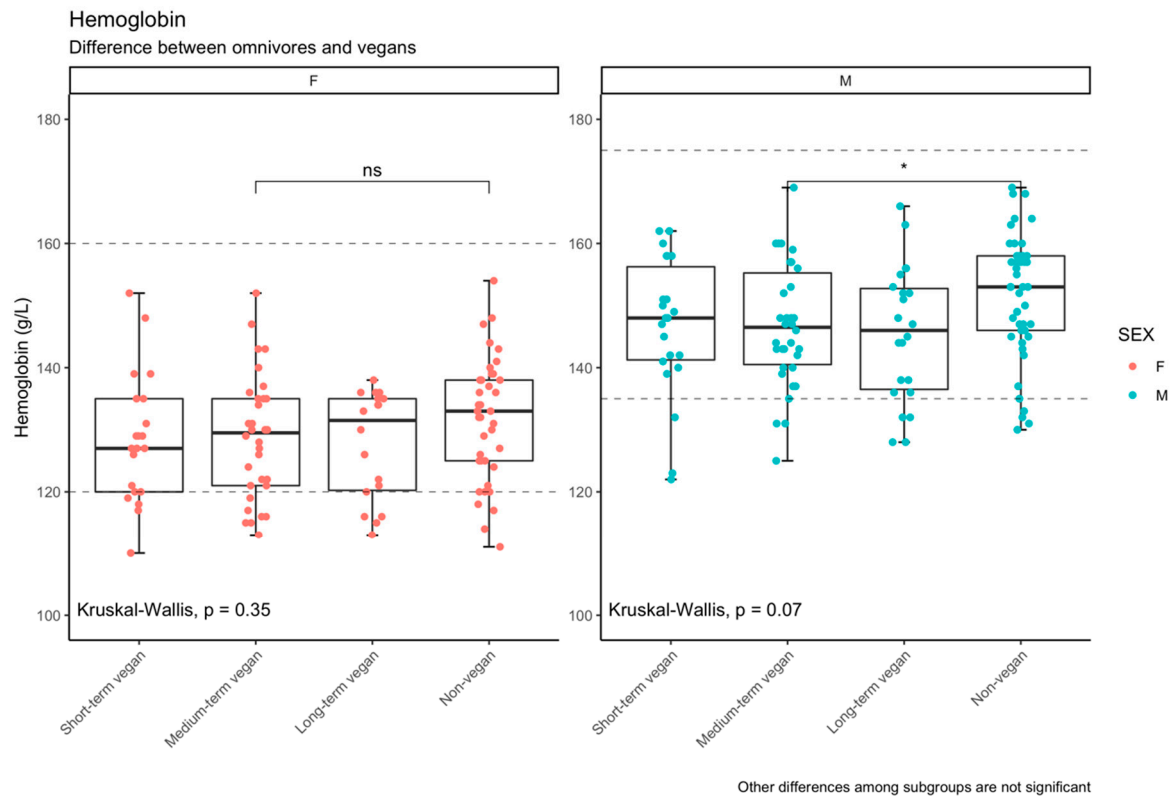

**Supplementary Figure S2.** Difference in HGB between vegans and non-vegans, division into subgroups based on duration of vegan diet and sex. Dashed lines indicated the reference interval of the marker. The coding of statistical significance:  $< 0.0001 = ****$ ,  $0.0001 - 0.001 = ***$ ,  $0.001 - 0.01 = **$ ,  $0.01 - 0.05 = *$ ,  $0.05 - 1 = ns$ .

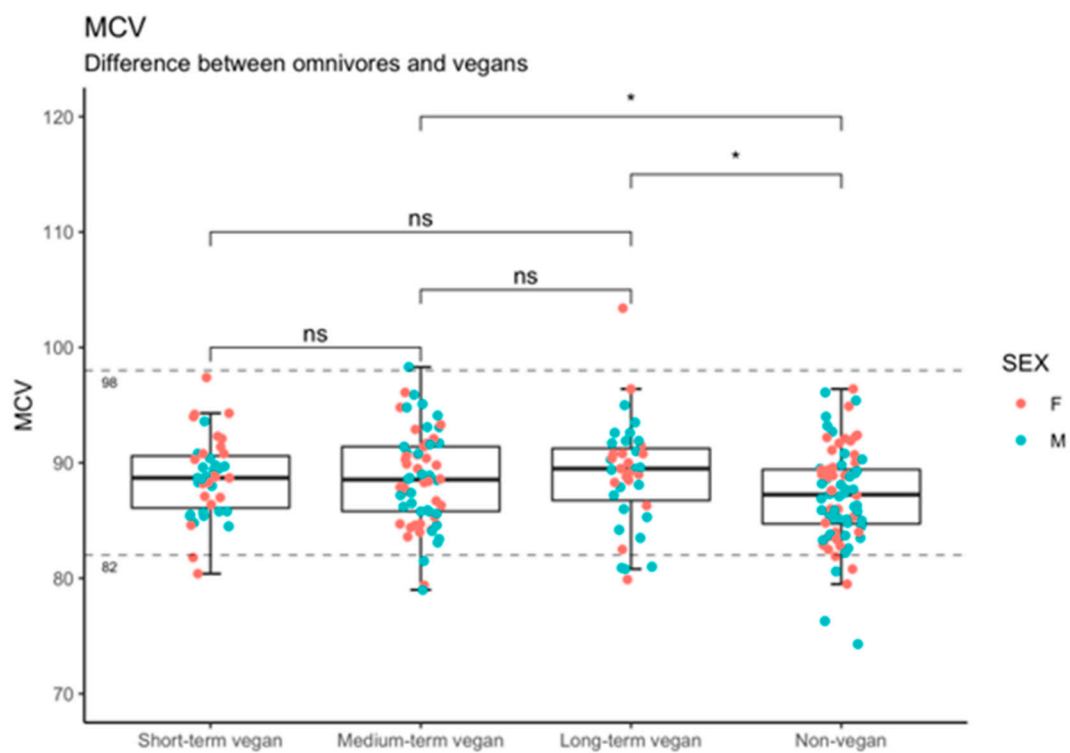

(a)

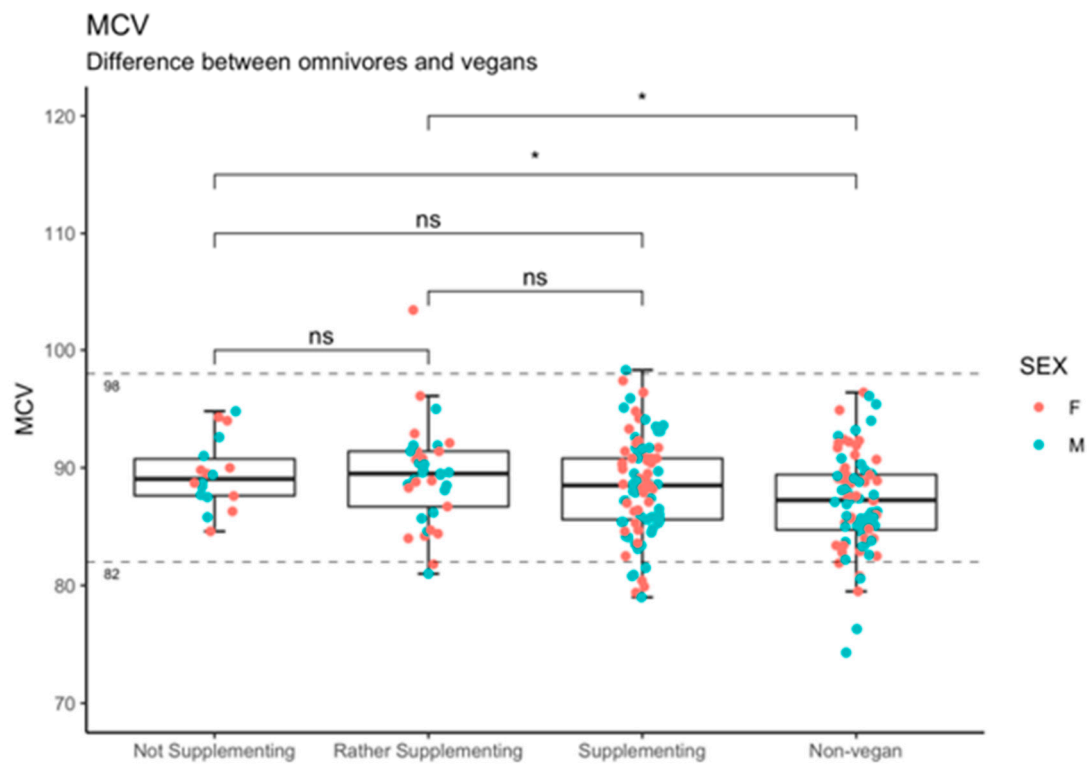

(b)

**Supplementary Figure S3.** (a) MCV based on the duration of veganism (compared to non-vegans); (b) MCV based on the supplementation habit (compared to non-vegans). Dashed lines indicate the reference interval of the marker. The coding of statistical significance:  $< 0.0001 = ****$ ,  $0.0001 - 0.001 = ***$ ,  $0.001 - 0.01 = **$ ,  $0.01 - 0.05 = *$ ,  $0.05 - 1 = ns$ .

**Supplementary table S1.** The risk of values suggesting cobalamin deficiencies in relation to supplement use (with adjustment for age, sex and the duration of vegan diet).

|                      | n   | % def. | supplement use | n  | %def. | OR    | CI 95%        | criteria                                                                                                        |
|----------------------|-----|--------|----------------|----|-------|-------|---------------|-----------------------------------------------------------------------------------------------------------------|
| Cobalamin            | 146 | 15.75  | Regular        | 90 | 8.89  | ref.  | -             | cobalamin < 190 ng/l                                                                                            |
|                      |     |        | Irregular      | 39 | 20.5  | 3.50  | 1.12- 10.95   |                                                                                                                 |
|                      |     |        | None           | 17 | 41.2  | 7.69  | 2.11 – 28.05  |                                                                                                                 |
| Holotranscobalamin   | 100 | 15     | Regular        | 63 | 4.76  | Ref.  | -             | cobalamin < 37.5 pmol/L                                                                                         |
|                      |     |        | Irregular      | 25 | 33.3  | 28.12 | 2.57 – 307.0  |                                                                                                                 |
|                      |     |        | None           | 12 | 32.0  | 19.18 | 1.02 – 359.0  |                                                                                                                 |
| Homocysteine         | 144 | 36.81  | Regular        | 90 | 27.8  | ref.  | -             | Homocysteine $\geq$ 15 $\mu$ mol/l                                                                              |
|                      |     |        | Irregular      | 37 | 40.5  | 2.02  | 0.86 - 4.76   |                                                                                                                 |
|                      |     |        | None           | 17 | 76.5  | 9.60  | 2.69 - 34.20  |                                                                                                                 |
| Vitamin B12 combined | 146 | 14,4   | Regular        | 90 | 5.56  | ref.  | -             | cobalamin < 100 ng/l or cobalamin < 200 ng/l with folate $\geq$ 4.6 $\mu$ g/l and homocysteine > 15 $\mu$ mol/l |
|                      |     |        | Irregular      | 39 | 17.9  | 5.06  | 1.35 – 18.96  |                                                                                                                 |
|                      |     |        | None           | 17 | 52.9  | 29.47 | 6.38 - 135.99 |                                                                                                                 |
| MCV increased        | 146 | 17.12  | Regular        | 91 | 17.6  | ref.  | -             | MCV > 92 fl                                                                                                     |
|                      |     |        | Irregular      | 38 | 13.2  | 0.67  | 0.22- 2.02    |                                                                                                                 |
|                      |     |        | None           | 17 | 23.5  | 1.48  | 0.47 – 4.09   |                                                                                                                 |

*n* = number of patients with the value available for analysis, % def. = percentage of patients with suspected deficit based on this value, OR = odds ratio, CI 95% = 95% confidence interval.

**Supplementary table S2.** The risk of values suggesting nutritional deficiencies in relation to duration of being vegan.

| The risk of values suggesting cobalamin deficiencies in relation to duration of being vegan (with adjustment for age, sex and supplementation habit) |          |            |             |          |      |      |             |                                                                                                                                        |
|------------------------------------------------------------------------------------------------------------------------------------------------------|----------|------------|-------------|----------|------|------|-------------|----------------------------------------------------------------------------------------------------------------------------------------|
|                                                                                                                                                      | <i>n</i> | %<br>path. | duration    | <i>n</i> | %    | OR   | CI 95%      | criteria                                                                                                                               |
| Cobalamin                                                                                                                                            | 146      | 15.75      | Long-term   | 41       | 19.5 | 0.58 | 0.18 - 1.89 | cobalamin < 190<br>ng/l                                                                                                                |
|                                                                                                                                                      |          |            | Medium-term | 66       | 6.06 | 0.16 | 0.04 - 0.58 |                                                                                                                                        |
|                                                                                                                                                      |          |            | Short-term  | 39       | 28.2 | ref. | -           |                                                                                                                                        |
| Homocysteine                                                                                                                                         | 144      | 36.81      | Long-term   | 39       | 43.6 | 0.96 | 0.35 - 2.67 | Homocysteine >=<br>15 µmol/l                                                                                                           |
|                                                                                                                                                      |          |            | Medium-term | 65       | 26.2 | 0.43 | 0.17 - 1.05 |                                                                                                                                        |
|                                                                                                                                                      |          |            | Short-term  | 40       | 47.5 | ref. | -           |                                                                                                                                        |
| Vitamin B12<br>combined                                                                                                                              | 146      | 14,4       | Long-term   | 41       | 17.1 | 0.60 | 0.16 - 2.25 | cobalamin < 100<br>ng/l or<br>cobalamin >= 100<br>ng/l but < 200 ng/l<br>with folate >= 4.6<br>µg/l and<br>homocysteine > 15<br>µmol/l |
|                                                                                                                                                      |          |            | Medium-term | 66       | 4.55 | 0.08 | 0.02 - 0.41 |                                                                                                                                        |
|                                                                                                                                                      |          |            | Short-term  | 39       | 28.2 | ref. | -           |                                                                                                                                        |
| MCV increased                                                                                                                                        | 146      | 17.12      | Long-term   | 40       | 15   | 0.94 | 0.25 - 3.48 | MCV > 92 fl                                                                                                                            |
|                                                                                                                                                      |          |            | Medium-term | 66       | 19.7 | 1.39 | 0.47 – 4.09 |                                                                                                                                        |
|                                                                                                                                                      |          |            | Short-term  | 40       | 15   | ref. | -           |                                                                                                                                        |

*n* = number of patients with the value available for analysis, % def. = percentage of patients with suspected deficit based on this value, OR = odds ratio, CI 95% = 95% confidence interval.

**Supplementary Table S3:** The risk of values suggesting iron deficiency in relation to duration of being vegan (with adjustment for age, sex and supplementation habit).

|                                                                                     | <i>n</i> | %<br>path. | duration    | <i>n</i> | %        | OR        | CI 95%           | criteria                                                                                             |
|-------------------------------------------------------------------------------------|----------|------------|-------------|----------|----------|-----------|------------------|------------------------------------------------------------------------------------------------------|
| Decreased HGB                                                                       | 146      | 15.75      | Long-term   | 41       | 17.<br>1 | 1.26      | 0.32 – 4.94      | M: HGB < 130 g/L<br>F: HGB < 120g/L                                                                  |
|                                                                                     |          |            | Medium-term | 66       | 12.<br>1 | 0.78      | 0.23 - 2.69      |                                                                                                      |
|                                                                                     |          |            | Short-term  | 40       | 12.<br>5 | ref.      | -                |                                                                                                      |
| MCV decreased                                                                       | 145      | 7.53       | Long-term   | 40       | 15       | 14.6<br>2 | 1.67 –<br>127.55 | MCV < 82 fl                                                                                          |
|                                                                                     |          |            | Medium-term | 66       | 4.5<br>5 | 1.33      | 0.18 - 9.63      |                                                                                                      |
|                                                                                     |          |            | Short-term  | 40       | 5        | ref.      | -                |                                                                                                      |
| Ferritin                                                                            | 142      | 14,4       | Long-term   | 38       | 47.<br>4 | 1.14      | 0.34 - 3.81      | Ferritin < 30 µg/L                                                                                   |
|                                                                                     |          |            | Medium-term | 65       | 49.<br>2 | 0.91      | 0.33 - 2.53      |                                                                                                      |
|                                                                                     |          |            | Short-term  | 39       | 41.<br>0 | ref.      | -                |                                                                                                      |
| Decreased HGB,<br>decreased ferritin                                                | 146      | 11.64      | Long-term   | 40       | 17.<br>5 | 2.07      | 0.46 - 9.12      | M: HGB < 130 g/L<br>F: HGB < 120g/L<br>and ferritin < 30 µg/L                                        |
|                                                                                     |          |            | Medium-term | 66       | 9.0<br>9 | 0.69      | 0.17 – 2.76      |                                                                                                      |
|                                                                                     |          |            | Short-term  | 40       | 10.<br>0 | ref.      | -                |                                                                                                      |
| Decreased ferritin<br>OR decreased<br>iron OR<br>decreased iron<br>binding capacity | 141      | 51.77      | Long-term   | 38       | 50.<br>0 | 1.14      | 0.34 – 3.81      | ferritin < 30 OR µg/L<br>OR iron < M 7.2/ F 6.6<br>µmol/L OR iron<br>binding capacity < 45<br>µmol/L |
|                                                                                     |          |            | Medium-term | 65       | 55.<br>4 | 0.91      | 0.33 - 2.53      |                                                                                                      |
|                                                                                     |          |            | Short-term  | 38       | 47.<br>4 | ref.      | -                |                                                                                                      |

*n* = number of patients with the value available for analysis, % def. = percentage of patients with suspected deficit based on this value, OR = odds ratio, CI 95% = 95% confidence interval.
